# Supplementary material for: Gli Proteins: Regulation in Development and Cancer
Source: MDPI journal article supplement (doi:10.3390/cells8020147), 2019-02-11
Supplement: s1 [file s1]

**Supplemental Table S1.** Genetic and epigenetic modifications of Gli genes in human cancer

| Member of Gli family         | Tumor type                          | Mutation type                                              | Predicted effect of the mutation                                      | Reference |
|------------------------------|-------------------------------------|------------------------------------------------------------|-----------------------------------------------------------------------|-----------|
| <i>GLI1</i> ,<br><i>GLI2</i> | medulloblastoma                     | gene amplification                                         | increased expression                                                  | [220]     |
| <i>GLI1</i>                  | breast cancer,<br>rhabdomyosarcoma  | gene amplification                                         | increased expression*                                                 | [221–224] |
| <i>GLI2</i>                  | oral squamous cell carcinoma        | gene amplification                                         | increased expression                                                  | [225]     |
| <i>GLI1</i>                  | pericytoma                          | gene fusion with <i>ACTB</i> gene                          | increased expression, gain of function (loss of SuFu binding domain)* | [226,227] |
| <i>GLI1</i>                  | Merkel cell carcinoma               | synonymous substitution                                    | no effect on protein function*                                        | [228]     |
| <i>GLI1</i> ,<br><i>GLI3</i> | T-cell acute lymphoblastic leukemia | somatic missense substitutions                             | altered function ? (located in ZF, SuFu binding, and A1 domains)*     | [229]     |
| <i>GLI1</i>                  | gastric and colorectal cancer       | frameshift mutations                                       | loss of function*                                                     | [230]     |
| <i>GLI1</i> ,<br><i>GLI3</i> | breast and colorectal cancer        | somatic mutations                                          | ? – mostly located in poorly conserved regions*                       | [231]     |
| <i>GLI1</i> ,<br><i>GLI3</i> | pancreatic cancer                   | somatic mutations                                          | altered function ? (located in repressor and SuFu binding domains)*   | [232]     |
| <i>GLI3</i>                  | gastric cancer                      | hypermethylation                                           | reduced expression*                                                   | [233]     |
| <i>GLI1</i>                  | soft tissue sarcoma                 | truncating and nonsynonymous mutations, gene amplification | specific mutations not described*                                     | [234]     |

\* Effects of mutations not tested experimentally
